# Supplementary material for: Interfacial modification via aniline molecules with multiple active sites for performance enhancement of n–i–p perovskite solar cells
Source: Royal Society of Chemistry journal article supplement (doi:10.1039/d3tc02144k), 2023-01-01
Supplement: d3tc02144k1.pdf [file d3tc02144k1.pdf]

## Supporting Information

### **Interfacial Modification via Aniline Molecules with Multiple Active Sites for Performance Enhancement of n-i-p Perovskite Solar Cells**

Zhiquan An<sup>a</sup>, Siying Chen<sup>a</sup>, Tao Lu<sup>a</sup>, Pengjun Zhao<sup>b</sup>, Xiaodong Yang<sup>a</sup>, Yang Li<sup>a,c,\*</sup>, Juan Hou<sup>a,\*</sup>

<sup>a</sup>Xinjiang Production & Construction Corps Key Laboratory of Advanced Energy Storage Materials and Technology, College of Science, Shihezi University, No. 221 Beisi Road, Shihezi, 832003, Xinjiang, China

<sup>b</sup>Xinjiang Technical Institute of Physics and Chemistry, Chinese Academy of Sciences, Urumqi 830011, Xinjiang, China

<sup>c</sup>Bingtuan Energy Development Institute, Shihezi University, No. 221 Beisi Road, Shihezi, 832003, Xinjiang, China

\* Corresponding Authors (J. Hou, Y. Li).

E-mail: [hjuan05@shzu.edu.cn](mailto:hjuan05@shzu.edu.cn) (J. Hou)

E-mail: [yang2022@shzu.edu.cn](mailto:yang2022@shzu.edu.cn) (Y. Li).

**First-principle calculations:**

In this work, Device Studio program provides a number of functions for performing visualization, modeling and simulation. And based on density functional theory (DFT), all our calculations are performed using DS-PAW software integrated in Device Studio program<sup>1, 2</sup>. The generalized gradient approximation (GGA) of the Perdew-Burke-Ernzerhof (PBE) functional is used as the exchange-correlation functional<sup>3</sup>. A vacuum thickness of 20 Å is built to avoid the interactions between adjacent layers. Slab models of three-layered  $\text{PbI}_2/\text{C}_9\text{H}_{10}\text{N}_2\text{O}_4$  and two-layered  $\text{PbI}_2/\text{C}_9\text{H}_{10}\text{N}_2\text{O}_4$  and their junction were constructed for simulation<sup>4</sup>. The Monkhorst-Pack k-point meshes of  $2 \times 1 \times 4$  is adopted for geometrical optimization and electronic structure calculations in unit cell of  $\text{PbI}_2/\text{C}_9\text{H}_{10}\text{N}_2\text{O}_4$ . The cutoff factor is set as 1. During optimization, all the structures were fully relaxed with the force and total energy convergence criteria of 0.883 eV Å and 1e-4eV, respectively. During adsorption and diffusion processes, the DFT-D2 method with Grimme correction is adopted to describe the long-range van der Waals interactions<sup>5, 6</sup>. Besides, three-layered of lead iodide and two-layered of lead iodide are used as substrates, and the k-points is set as  $2 \times 1 \times 4$ .

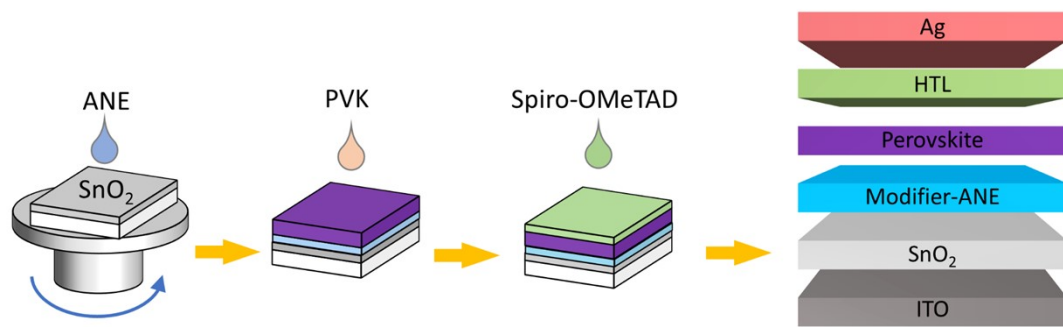

**Fig. S1.** The preparation process of the PSCs used in this work.

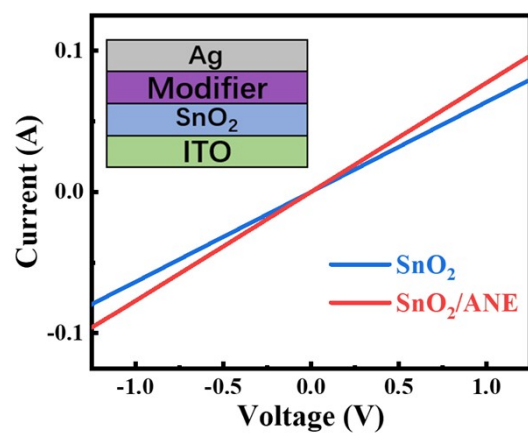

**Fig. S2.** I-V curves of the SnO<sub>2</sub> films without and with ANE.

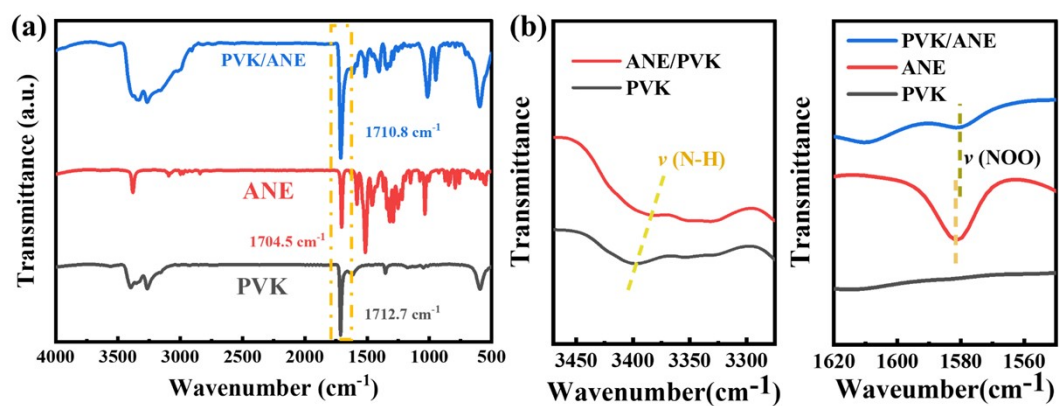

**Fig. S3.** FTIR spectra of PVK, ANE and PVK modified with ANE.

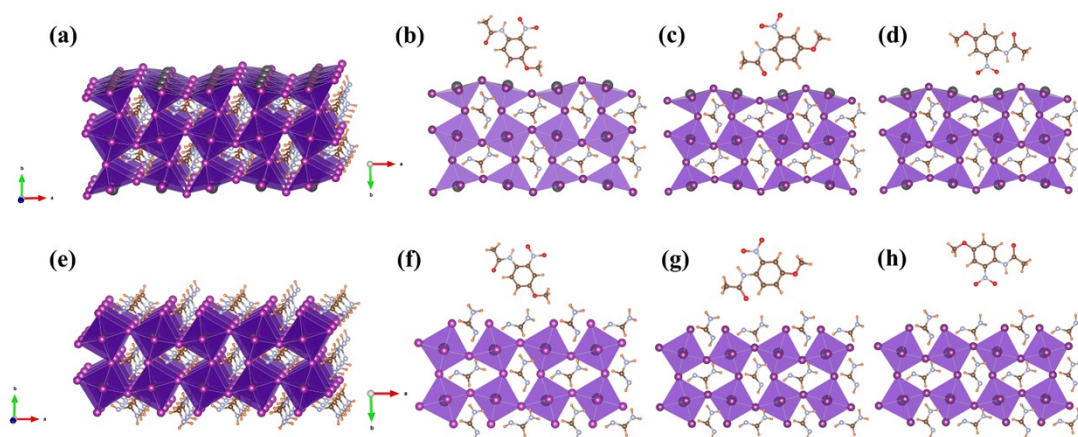

**Fig. S4.** Structure diagrams of unadsorbed substrate for (a)  $\text{PbI}_2$  and (e) FAI terminations. The interfaces for the inorganic  $\text{PbI}_2$  termination in contact with the different sites of ANE molecules (b-d), and the models were C-O-C, C=O and NOO sites, respectively. The interfaces for the organic FAI termination in contact with the different sites of ANE molecules (f-h), and the models were C-O-C, C=O and NOO sites, respectively.

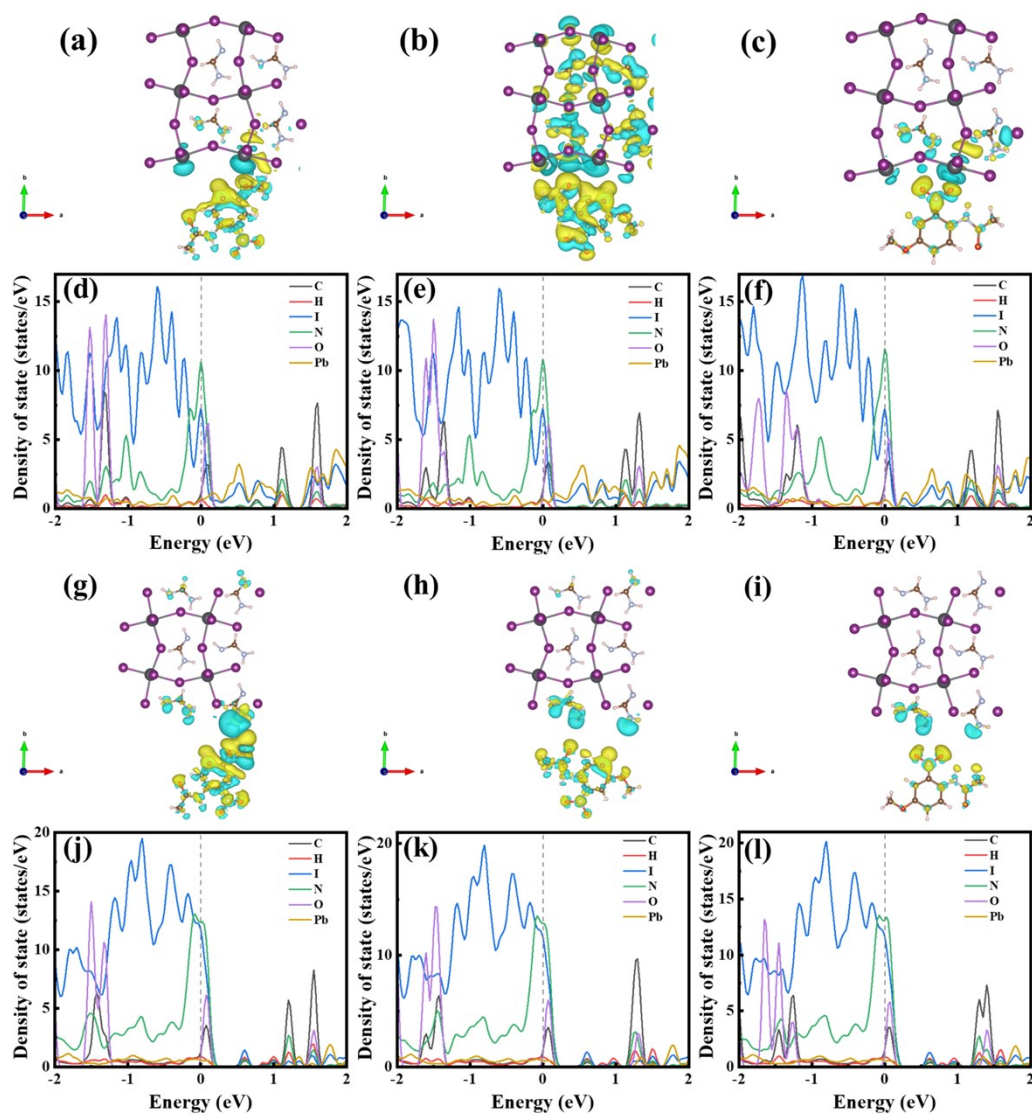

**Fig. S5.** Differential charge density and corresponding DOS diagram of contact between different active sites of ANE and PbI<sub>2</sub> and FAI terminations.

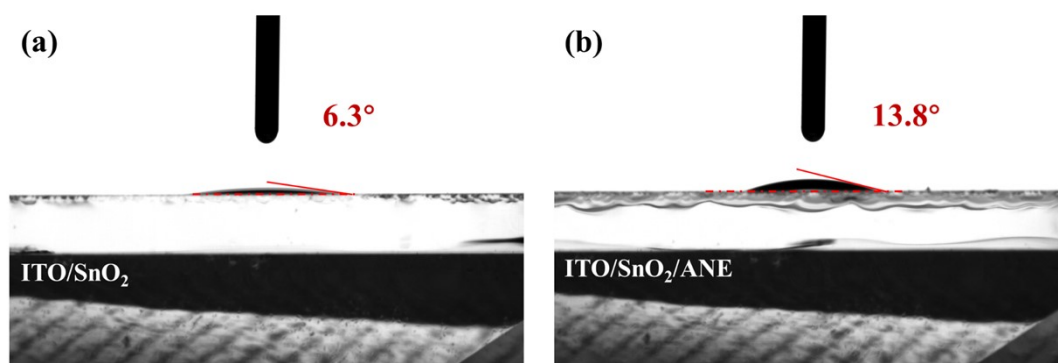

**Fig. S6.** Contact angle measurements of the (a) control and (b) modified SnO<sub>2</sub> films with ANE.



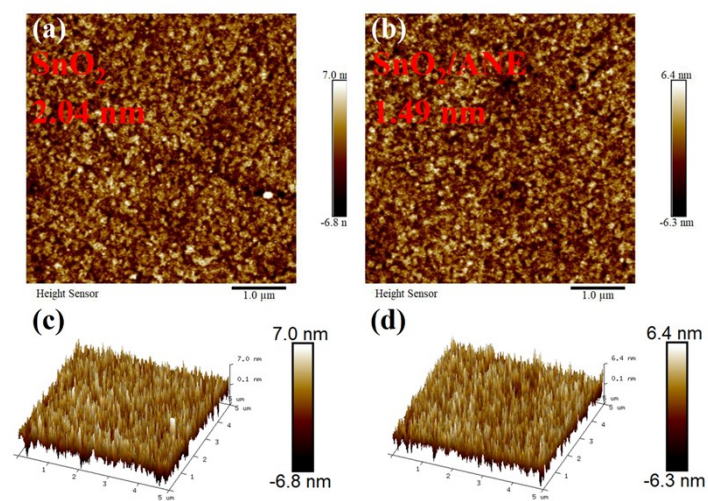

**Fig. S7.** AFM images of (a) the pristine  $\text{SnO}_2$  and (b)  $\text{SnO}_2/\text{ANE}$  films. 3D AFM images of (c)  $\text{SnO}_2$  and (d)  $\text{SnO}_2/\text{ANE}$  films.

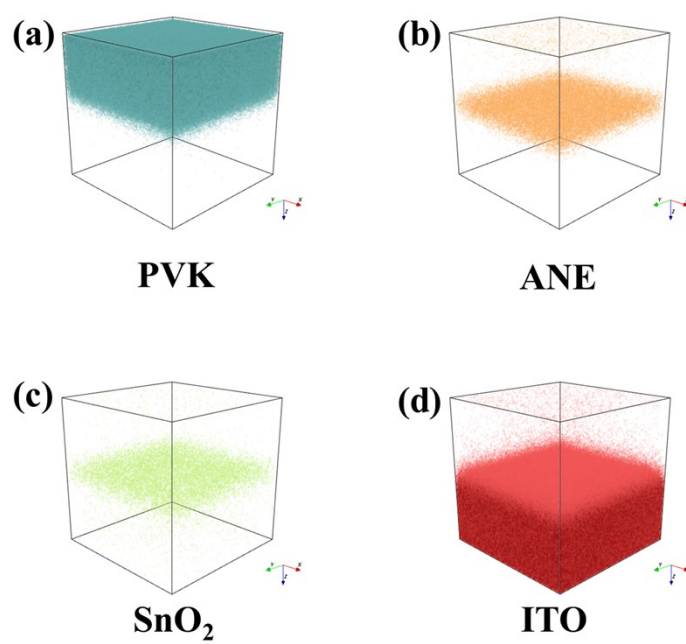

**Fig. S8.** ToF-SIMS 3D-depth profiles of the target devices with the structure of ITO/SnO<sub>2</sub>/ANE/perovskite.

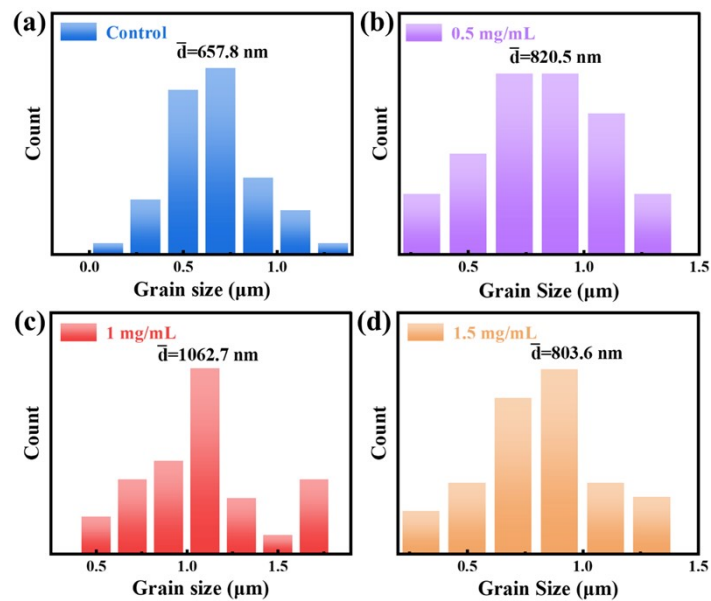

**Fig. S9.** Statistical distribution of PVK grains modified with different concentration of ANE.

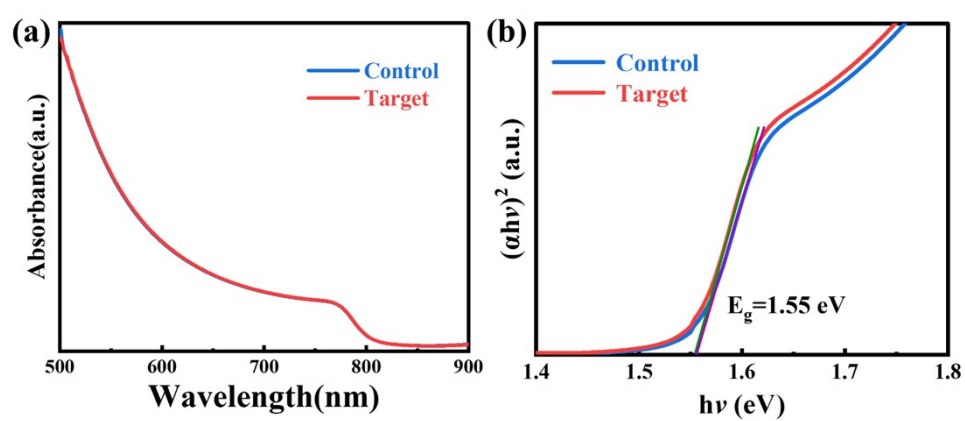

**Fig. S10.** (a) UV-Vis absorption spectra of the perovskite films without and with ANE passivation. The corresponding Tauc plot is shown in (b).

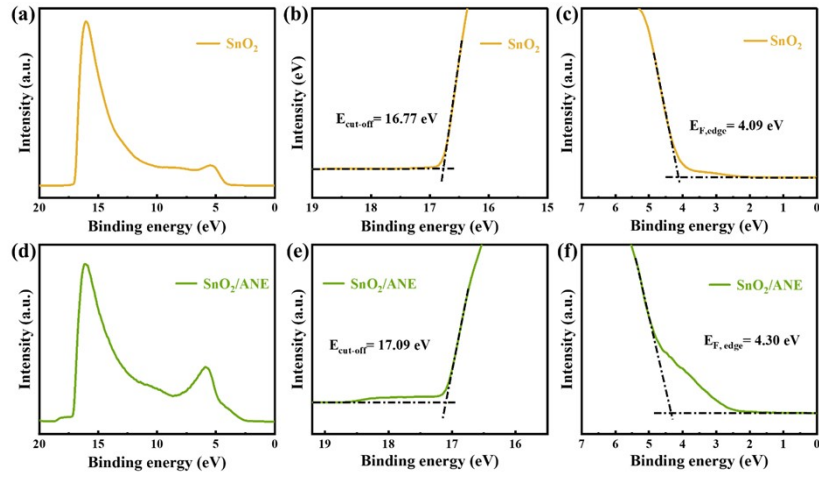

**Fig. S11.** (a) and (d) UPS full spectra. (b) and (e) UPS spectra describing the cut-off energy ( $E_{\text{cut-off}}$ ). (c) and (f) UPS spectra describing Fermi edge ( $E_{F,\text{edge}}$ ).

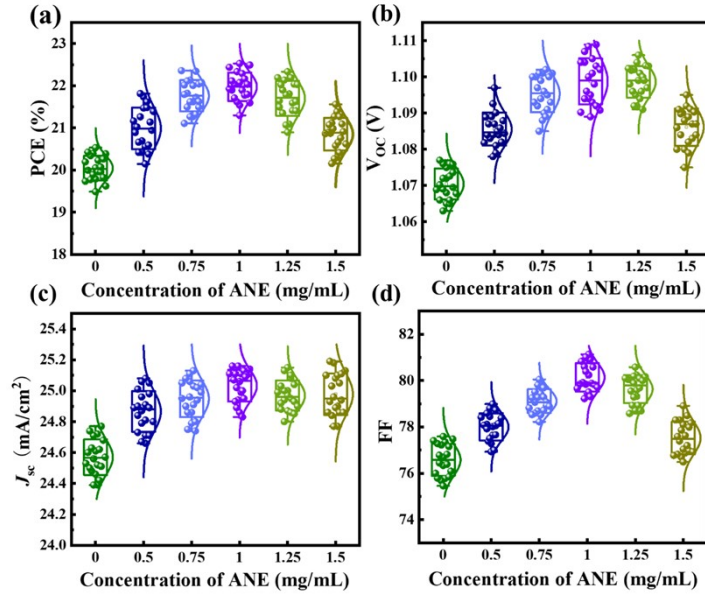

**Fig. S12.** Statistics of (a) PCE, (b) V<sub>OC</sub>, (c) J<sub>SC</sub>, and (d) FF of PSCs based on SnO<sub>2</sub> ETL modified by different concentrations of ANE.

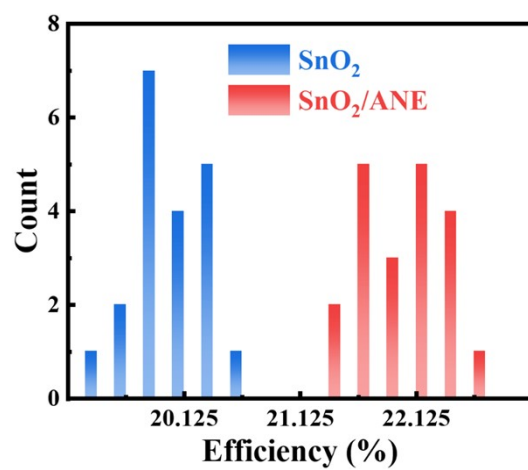

**Fig. S13.** Statistical distribution of PCEs of the PSCs based on the bare and modified  $\text{SnO}_2$  by ANE. The statistical data were obtained from 30 cells for each group.

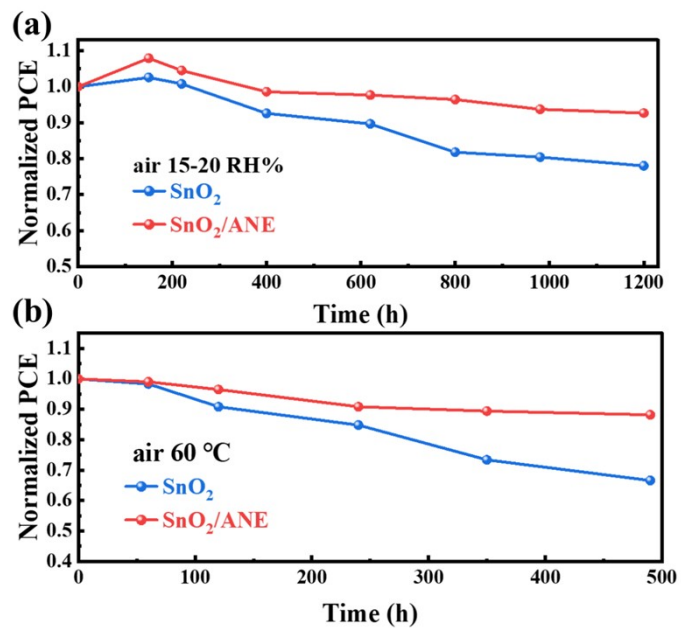

**Fig. S14.** (a) Moisture stability of the unsealed control and modified PSCs under an ambient condition with a relative humidity of 15–20% under dark. (b) Thermal stability of the unencapsulated control and modified devices at 60 °C in the air, under dark.



**Table S1.** Fitted results of TRPL curves of the perovskite films deposited on glass substrates with or without modifiers measured from perovskite side. The PVK represents the perovskite layer.

| Samples       | $\tau_1$ (ns) | $A_1$ (%) | $\tau_2$ (ns) | $A_2$ (%) | $\tau_{ave}$ (ns) |
|---------------|---------------|-----------|---------------|-----------|-------------------|
| Glass/PVK     | 147.94        | 18.36     | 451.97        | 81.64     | 431.12            |
| Glass/ANE/PVK | 265.30        | 22.74     | 763.08        | 77.26     | 716.87            |

**Table S2.** Fitted results of TRPL curves of the perovskite films deposited on SnO<sub>2</sub> substrates with or without modifiers measured from perovskite side. The PVK represents the perovskite layer.

| Samples                       | $\tau_1$ (ns) | $A_1$ (%) | $\tau_2$ (ns) | $A_2$ (%) | $\tau_{ave}$ (ns) |
|-------------------------------|---------------|-----------|---------------|-----------|-------------------|
| ITO/SnO <sub>2</sub> /PVK     | 144.69        | 6.03      | 507.67        | 93.97     | 501.15            |
| ITO/SnO <sub>2</sub> /ANE/PVK | 115.81        | 22.03     | 351.32        | 77.97     | 331.25            |

**Table S3.** The fitted EIS parameters of the devices based on SnO<sub>2</sub> and SnO<sub>2</sub>/ANE ETLs.

| ETL                   | $R_s$ ( $\Omega$ ) | $R_{ct}$ ( $\Omega$ ) | $R_{rec}$ ( $\Omega$ ) |
|-----------------------|--------------------|-----------------------|------------------------|
| SnO <sub>2</sub>      | 29.05              | 11806                 | 49720                  |
| SnO <sub>2</sub> /ANE | 43.01              | 7583                  | 78330                  |

**Table S4.** Photovoltaic parameters of the average performing control and target devices measured in RS and FS.

| Device  |    | $J_{SC}$ (mA/cm <sup>2</sup> ) | $V_{OC}$ (V) | FF     | PCE (%) | $R_s$ ( $\Omega$ ) | $R_{sh}$ ( $\Omega$ ) |
|---------|----|--------------------------------|--------------|--------|---------|--------------------|-----------------------|
| Control | FS | 24.52                          | 1.068        | 0.7595 | 19.88   | 4.12               | 6173.58               |
|         | RS | 24.53                          | 1.072        | 0.7682 | 20.20   | 4.07               | 7052.25               |
| Target  | FS | 25.12                          | 1.106        | 0.8104 | 22.51   | 3.30               | 9034.97               |
|         | RS | 25.14                          | 1.108        | 0.8110 | 22.59   | 3.11               | 11084.62              |

## References

1. P. E. Blöchl, *Phys. Rev. B*, 1994, **50**, 17953-17979.
2. D. S. Hongzhiwei Technology, Version 2021A, China, 2021. Available online: <https://iresearch.net.cn/cloudSoftware>.
3. J. P. Perdew, K. Burke and M. Ernzerhof, *Phys. Rev. Lett.*, 1996, **77**, 3865-3868.
4. G. Kresse and D. Joubert, *Physical Review B*, 1999, **59**, 1758-1775.
5. S. Grimme, J. Antony, S. Ehrlich and H. Krieg, *J. Chem. Phys.*, 2010, **132**, 154104.
6. K. Parlinski, Z. Q. Li and Y. Kawazoe, *Phys. Rev. Lett.*, 1997, **78**, 4063-4066.
